# Supplementary material for: Chemical sensors based on periodic mesoporous organosilica @NaYF4:Ln3+ nanocomposites
Source: Royal Society of Chemistry journal article supplement (doi:10.1039/d2dt01469f), 2022-01-01
Supplement: d2dt01469f1.pdf [file d2dt01469f1.pdf]

Chemical sensors based on Periodic Mesoporous Organosilica @ NaYF<sub>4</sub>: Ln<sup>3+</sup> nanocomposites

Wanlu Liu,<sup>[a, b, c]</sup> Anna M. Kaczmarek,<sup>\*[b]</sup> Pascal Van Der Voort,<sup>[c]</sup> and Rik Van Deun<sup>\*[a]</sup>

[a] L<sup>3</sup> – Luminescent Lanthanide Lab, Department of Chemistry, Ghent University, Krijgslaan 281-S3, 9000 Ghent, Belgium.

[b] NanoSensing Group, Department of Chemistry, Ghent University, Krijgslaan 281-S3, 9000 Ghent, Belgium.

[c] Center for Ordered Materials, Organometallics and Catalysis (COMOC), Department of Chemistry, Ghent University, Krijgslaan 281-S3, 9000 Ghent, Belgium.

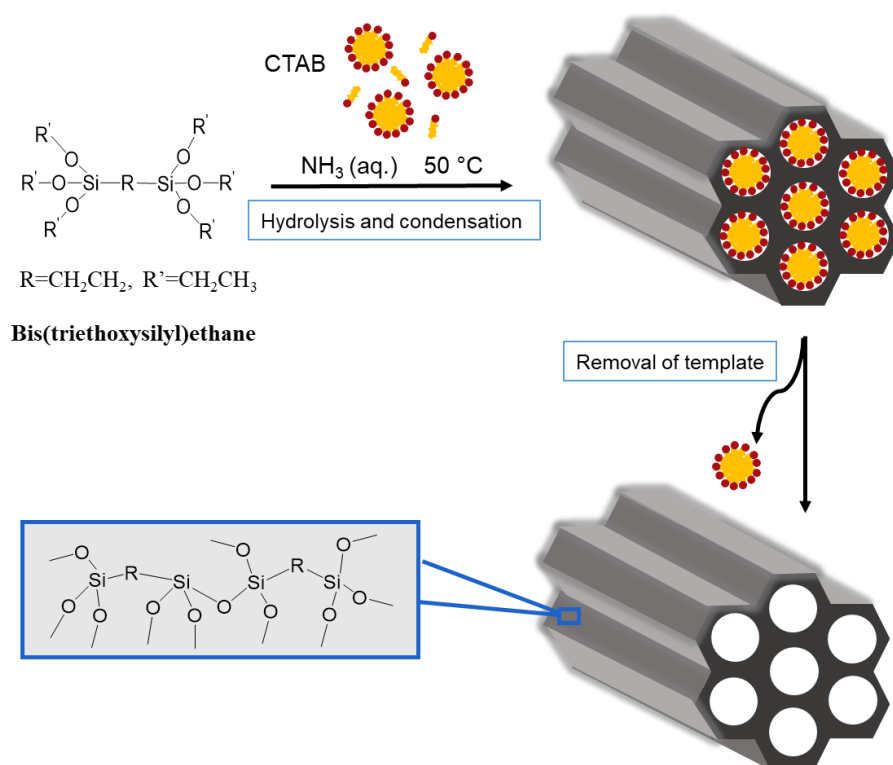

**Scheme S1.** Synthesis route of ethane PMO nanoparticles.

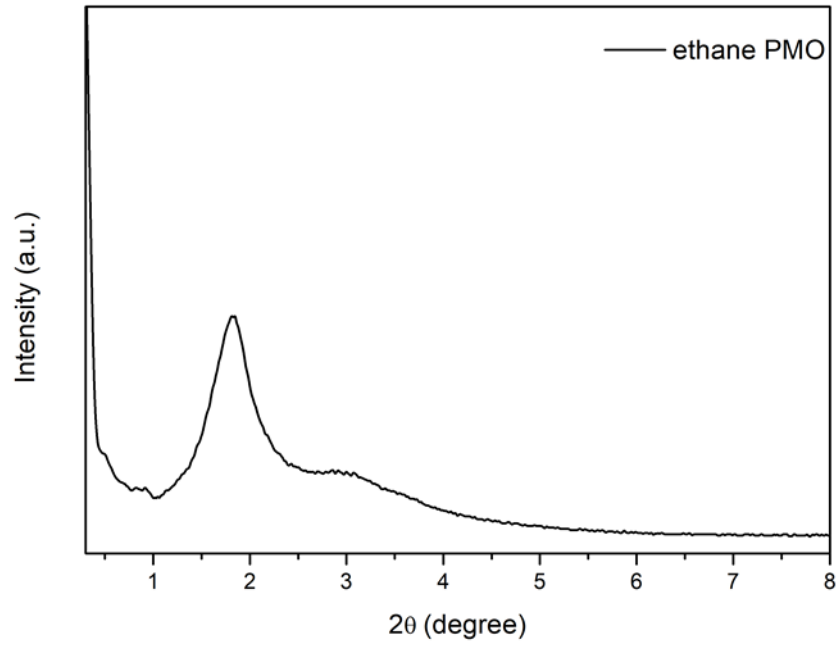

**Figure S1.** Powder XRD pattern of ethane PMO used for the preparation of PMO@NaYF<sub>4</sub>: Yb<sup>3+</sup>, Ln<sup>3+</sup> (Ln =Er, Tm, Ho) nanocomposites.

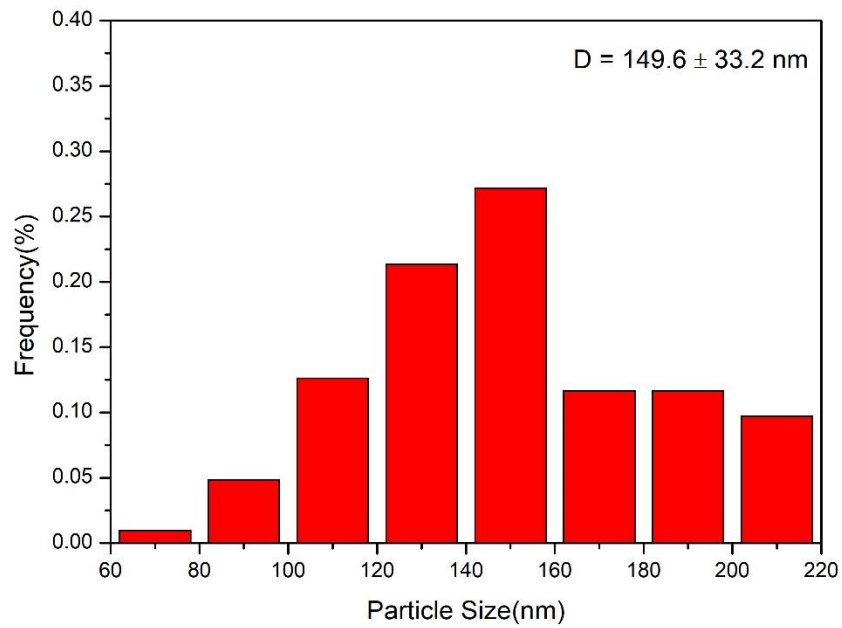

**Figure S2.** Particle size distribution diagram of ethane PMO nanoparticles.

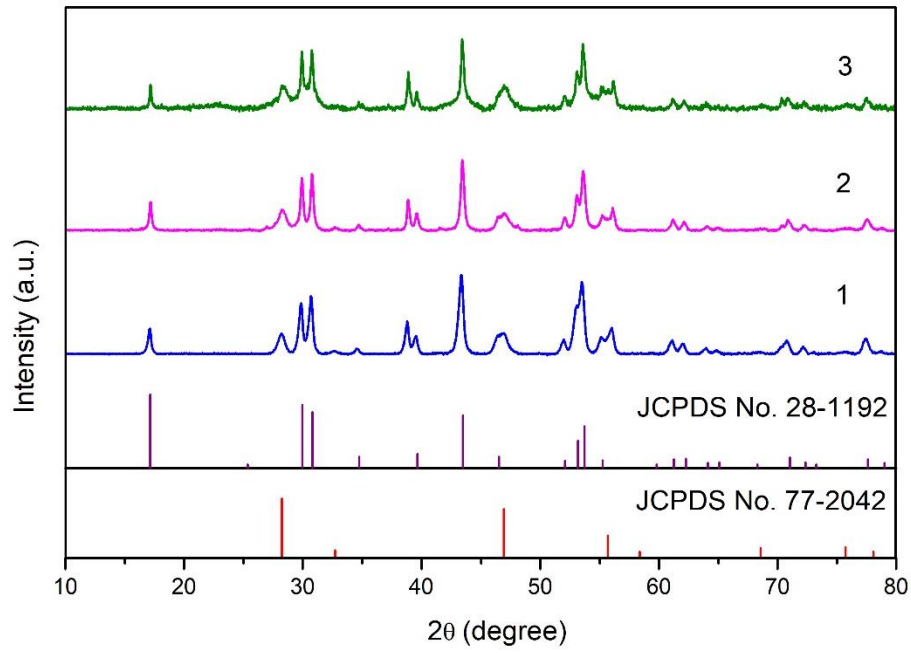

**Figure S3.** Powder XRD patterns of  $\text{PMO@NaYF}_4: \text{Yb}^{3+}, \text{Ho}^{3+}$  synthesized three times under the same synthesis conditions.

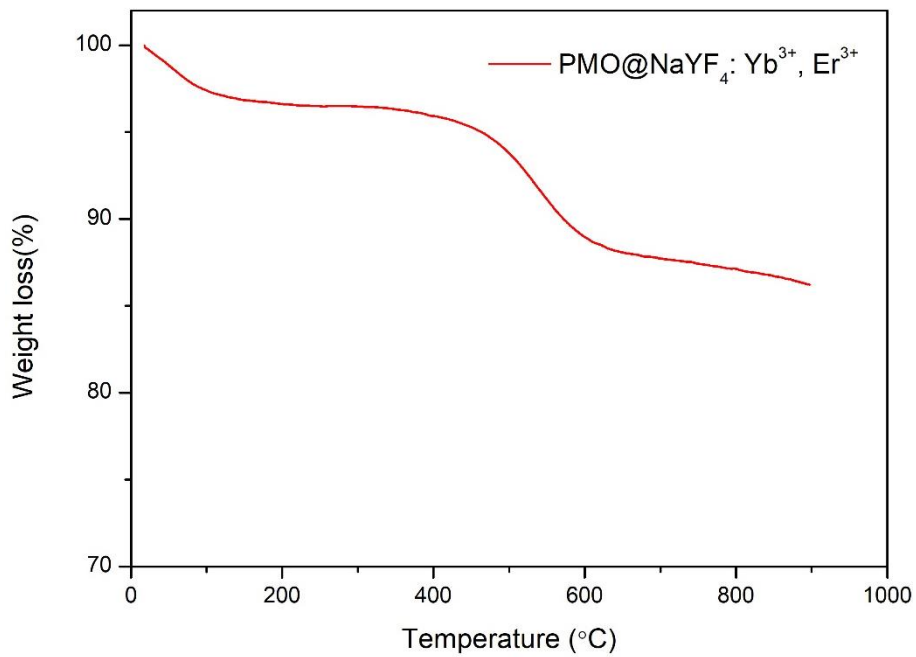

**Figure S4.** Thermogravimetric analysis of  $\text{PMO@NaYF}_4: \text{Yb}^{3+}, \text{Er}^{3+}$ .

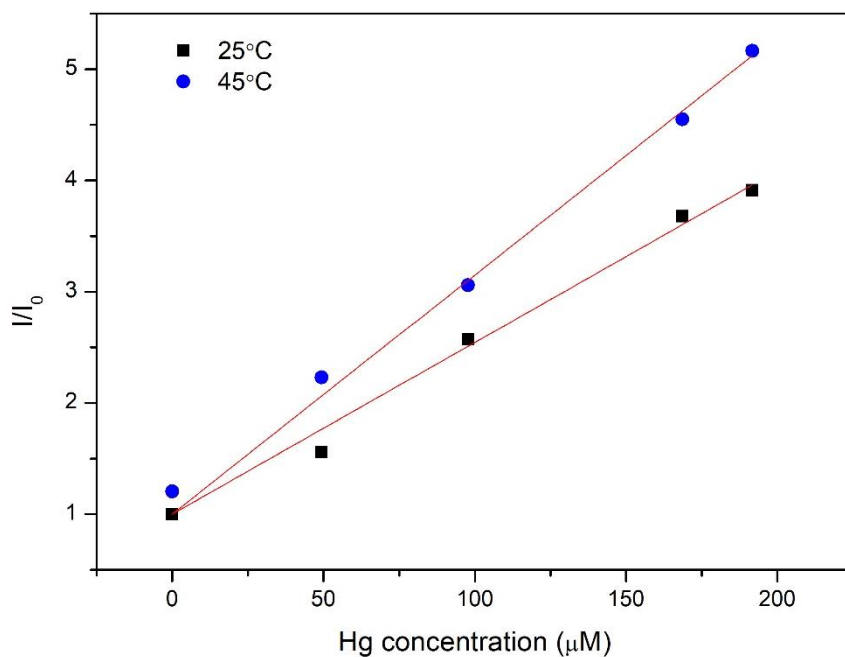

**Figure S5.** The Stern-Volmer plots of PMO@NaYF<sub>4</sub>: Yb<sup>3+</sup>, Er<sup>3+</sup> in the presence of Hg<sup>2+</sup> ions at different temperatures (25 °C and 45 °C). An increase of the slope with temperature increase suggests presence of dynamic quenching mechanism.

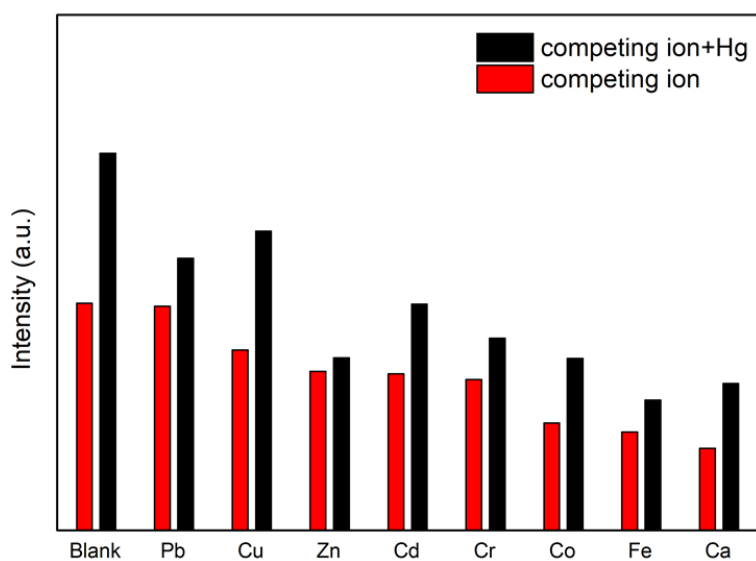

**Figure S6.** Luminescence emission intensity of PMO@NaYF<sub>4</sub>: Yb<sup>3+</sup>, Er<sup>3+</sup> in the presence of a single competing ion (red bars) and in the mixture of Hg<sup>2+</sup> and competing ions (black bars).

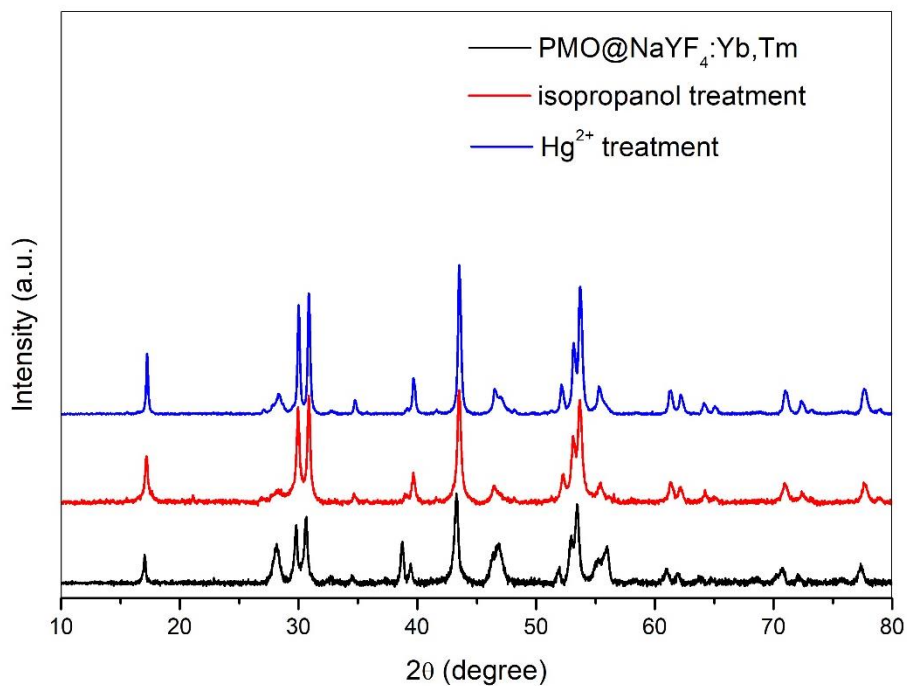

**Figure S7.** Combined powder XRD patterns of PMO@NaYF<sub>4</sub>: Yb<sup>3+</sup>, Tm<sup>3+</sup> before and after sensing experiments.

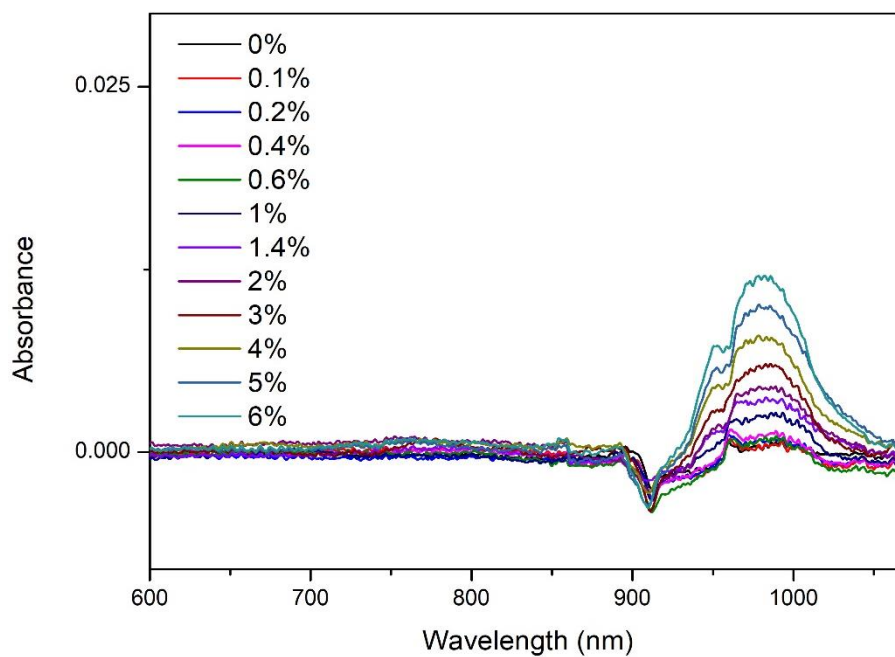

**Figure S8.** Absorption spectra of isopropanol containing varied water content.

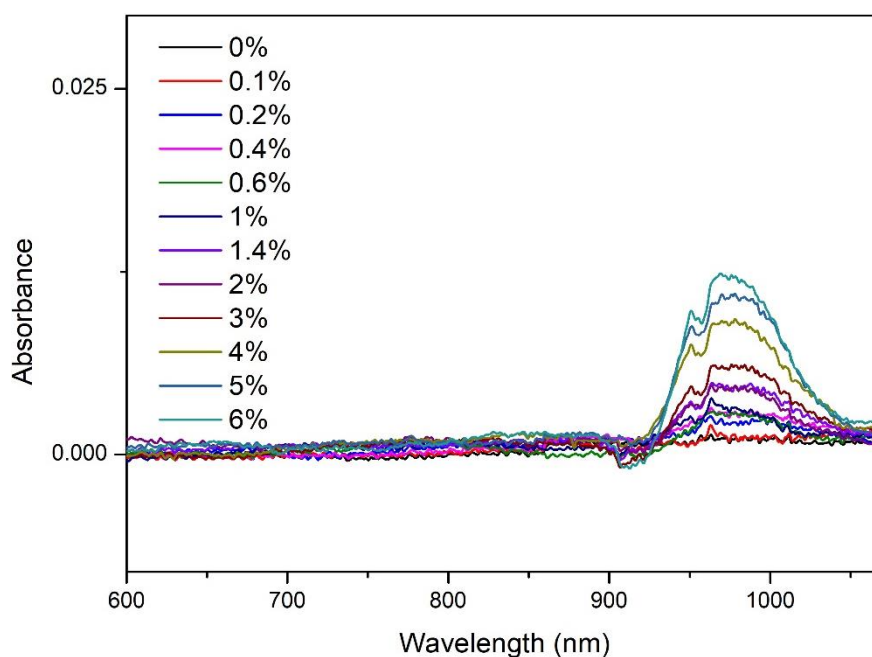

**Figure S9.** Absorption spectra of n-butanol containing varied water content.

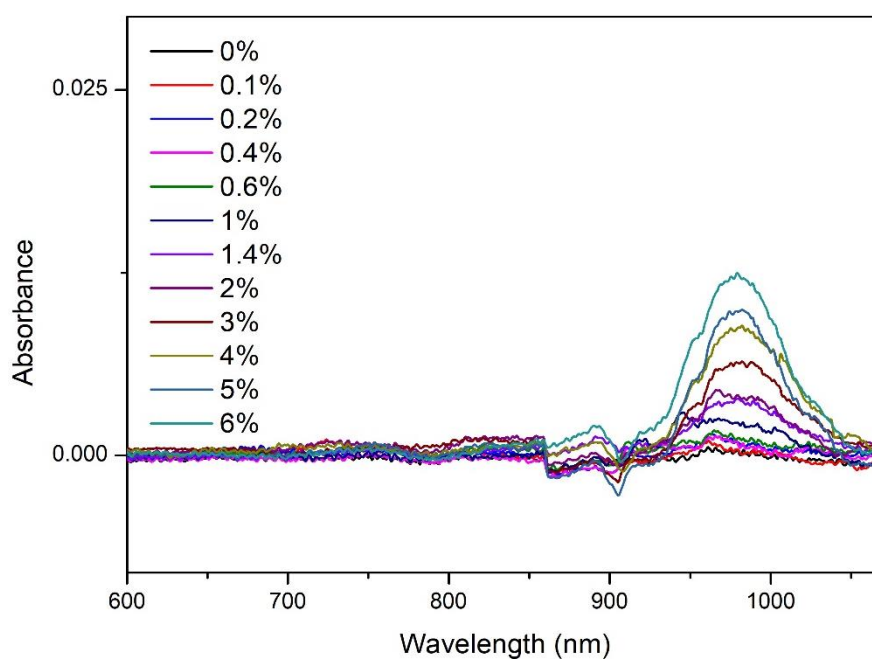

**Figure S10.** Absorption spectra of ethanol containing varied water content.

**Table S1.** Comparison of various upconversion luminescence sensors for Hg<sup>2+</sup> detection

| Sensors                                                     | Structure property | Need to pre-synthesize UCNPs? | Linear range ( $\mu\text{M}$ ) | Limit of detection ( $\mu\text{M}$ ) | Ref. |
|-------------------------------------------------------------|--------------------|-------------------------------|--------------------------------|--------------------------------------|------|
| A-DMSA-UCNPs                                                | Core-Shell         | Yes                           | 24-120                         | 2.47                                 | 1    |
| A-PAA-UCNPs                                                 | Core-Shell         | Yes                           | 13.4-40                        | 8.15                                 | 1    |
| Ru-UCNP@HmSiO <sub>2</sub> -PEI                             | Core-Shell         | Yes                           | 0-46                           | 0.16                                 | 2    |
| UCNPs-aptamers-GNPs                                         | Mixture            | Yes                           | 0.2-20                         | 0.06                                 | 3    |
| UCNP/ QDs                                                   | Composites         | Yes                           | 0.01-2.8                       | 0.015                                | 4    |
| PMO@NaYF <sub>4</sub> : Yb <sup>3+</sup> , Er <sup>3+</sup> | Composites;        | No                            | 0-214.6                        | 24.4                                 | This |

|  |        |  |  |      |
|--|--------|--|--|------|
|  | porous |  |  | work |
|--|--------|--|--|------|

**Table S2.** Comparison of various materials for determination of water content in organic solvents

| Sensors                                                     | Measured media           | Linear range (v/v) | Limit of detection (v/v) | Ref.      |
|-------------------------------------------------------------|--------------------------|--------------------|--------------------------|-----------|
| Lignin-derived red-emitting CDs                             | Ethanol                  | 10-60%             | 0.36                     | 5         |
| MOF:Tb                                                      | Ethanol                  | 0-11.76%           | 1.12%                    | 6         |
| FS@ZIF-9/Co-formate                                         | Ethanol<br>isopropanol   | 0-10%              | 0.43%<br>0.63%           | 7         |
| Eu <sup>3+</sup> @UiO-66-NH <sub>2</sub> -IM                | Ethanol                  | 0-2%               | 0.088%                   | 8         |
| PMO@NaYF <sub>4</sub> : Yb <sup>3+</sup> , Er <sup>3+</sup> | Isopropanol<br>n-butanol | 0-0.75%            | 0.21%<br>0.18%           | This work |
| PMO@NaYF <sub>4</sub> : Yb <sup>3+</sup> , Ho <sup>3+</sup> | Ethanol                  | 0-0.75%            | 0.29%                    | This work |

### References

- 1 C. Yang, Y. Li, N. Wu, Y. Zhang, W. Feng, M. Yu and Z. Li, *Sens. Actuators, B*, 2021, **326**, 128841.
- 2 X. Ge, L. Sun, B. Ma, D. Jin, L. Dong, L. Shi, N. Li, H. Chen and W. Huang, *Nanoscale*, 2015, **7**, 13877-13887.
- 3 Y. Liu, Q. Ouyang, H. Li, M. Chen, Z. Zhang and Q. Chen, *J. Agric. Food Chem.*, 2018, **66**, 6188-6195.
- 4 S. Cui, S. Xu, H. Song, W. Xu, X. Chen, D. Zhou, Z. Yin and W. Han, *RSC Adv.*, 2015, **5**, 99099-99106.
- 5 J. Wang, J. Wang, W. Xiao, Z. Geng, D. Tan, L. Wei, J. Li, L. Xue, X. Wang and J. Zhu, *Anal. Methods*, 2020, **12**, 3218-3224.
- 6 P. Majee, P. Daga, D. K. Singha, D. Saha, P. Mahata and S. K. Mondal, *J. Photochem. Photobiol., A*, 2020, **402**, 112830.
- 7 X. Zhao, M. Zheng, Y. Zhao, T. Wang, J. Li, Z. Xie, Y. Zhang, Z. Liu, X. Wang, Z. Gao and H. Huang, *Microporous Mesoporous Mater.*, 2019, **290**, 109624.
- 8 S.-Y. Zhu and B. Yan, *Ind. Eng. Chem. Res.*, 2018, **57**, 16564-16571.
